# Supplementary material for: Formation of hierarchically polyhedral Cu7S4 cages from Cu2O templates and their structure-dependent photocatalytic performances
Source: Royal Society of Chemistry journal article supplement (doi:10.1039/c3nj00575e), 2013-01-01
Supplement: c3nj00575e.pdf [file c3nj00575e.pdf]

Electronic Supplementary Information

## Formation of hierarchically polyhedral $\text{Cu}_7\text{S}_4$ cages from $\text{Cu}_2\text{O}$ templates and their structure-dependent photocatalytic performances

Shaodong Sun, Sarula Wang, Dongchu Deng and Zhimao Yang\*

*School of Science, State Key Laboratory for Mechanical Behavior of Materials, MOE Key Laboratory for Non-Equilibrium Synthesis and Modulation of Condensed Matter, Xi'an Jiaotong University, Xi'an 710049, ShaanXi, People's Republic of China.*

E-mail: zmyang@mail.xjtu.edu.cn.

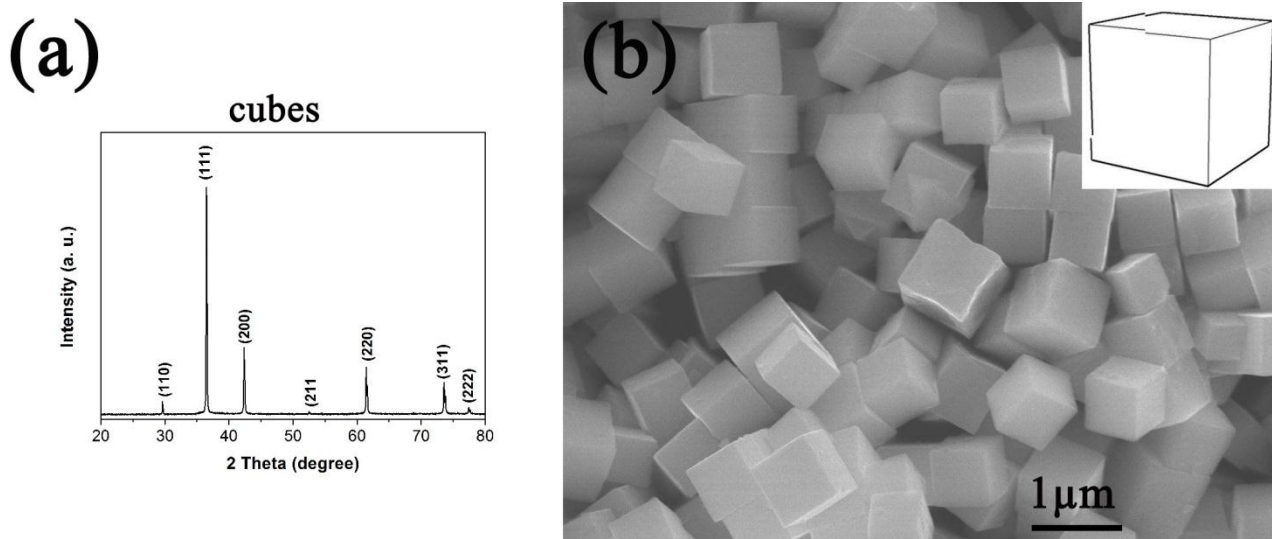

**Fig. S1** (a) XRD pattern of the cubic  $\text{Cu}_2\text{O}$  templates; (b) FESEM image of the cubic  $\text{Cu}_2\text{O}$  templates, the inset is the corresponding schematic illustration.

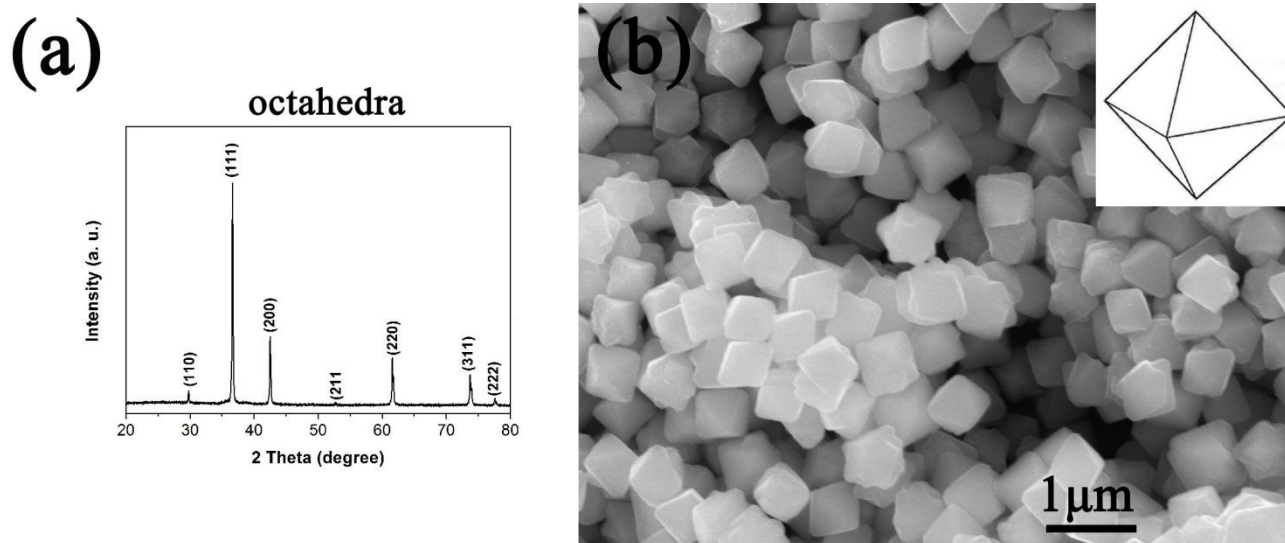

**Fig. S2** (a) XRD pattern of the octahedral  $\text{Cu}_2\text{O}$  templates; (b) FESEM image of the octahedral  $\text{Cu}_2\text{O}$  templates, the inset is the corresponding schematic illustration.

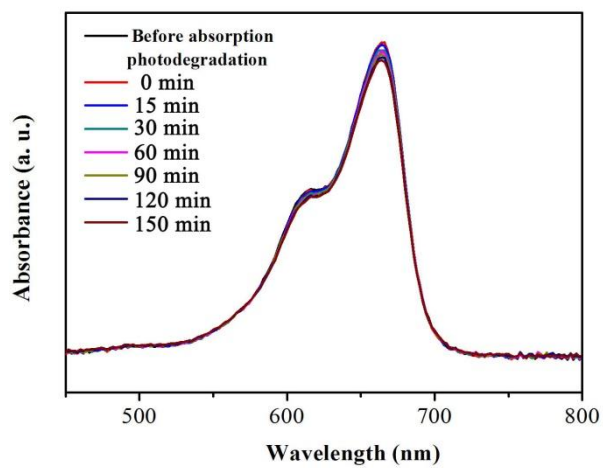

**Fig S3.** Absorption spectra of the MB solution in the absence of catalysts.

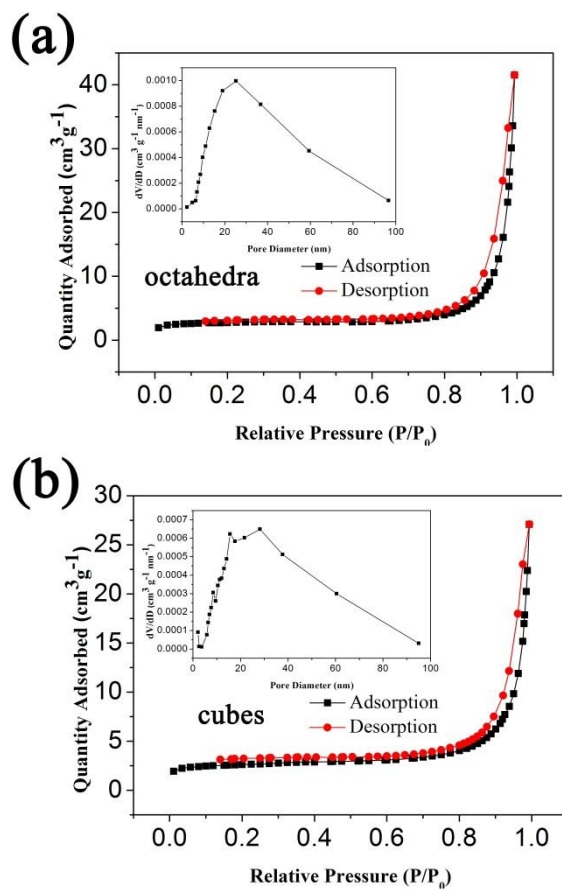

**Fig.S4** Typical nitrogen gas adsorption-desorption isotherms and pore size distribution curves (insets) of the hierarchical  $\text{Cu}_7\text{S}_4$  microcages: (a) the octahedral hierarchical  $\text{Cu}_7\text{S}_4$  microcages; (b) the cubic hierarchical  $\text{Cu}_7\text{S}_4$  microcages.

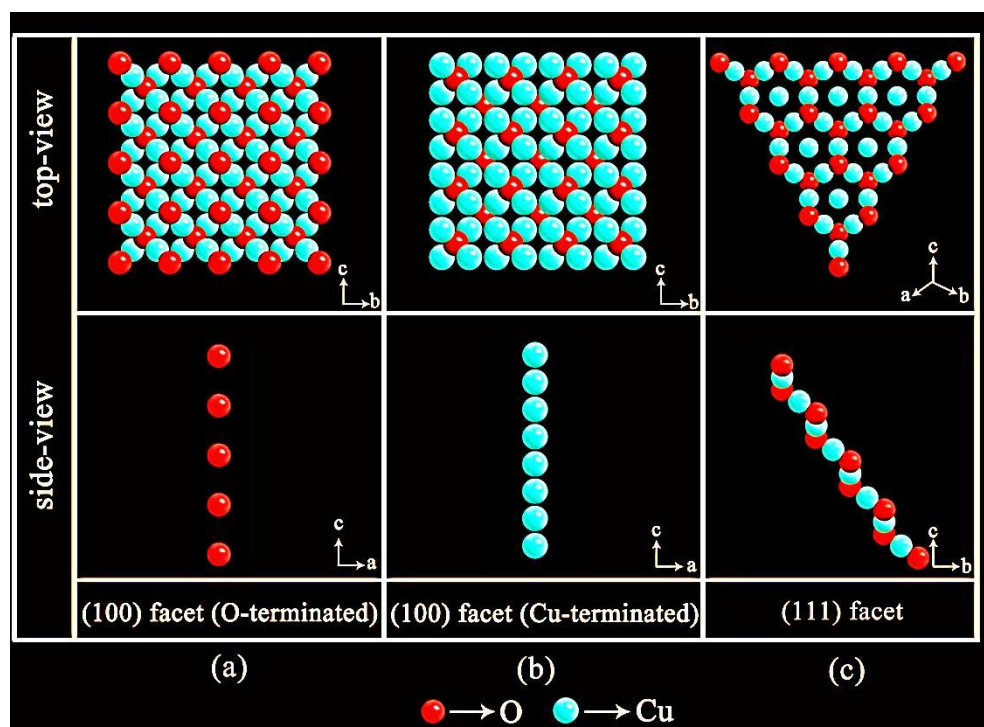

**Fig. S5** The crystallographic structures of {100} (a and b) and {111} (c) facets of Cu<sub>2</sub>O crystal.<sup>[1]</sup>

[1] Sun, S. D.; Zhang, X. Z.; Song, X. P.; Liang, S. H.; Wang, L. Q.; Yang, Z. M. *CrystEngComm* **2012**, *14*, 3545.
